# Supplementary material for: Comprehensive Analysis and Characterization of the GATA Gene Family, with Emphasis on the GATA6 Transcription Factor in Poplar
Source: MDPI journal article supplement (doi:10.3390/ijms241814118), 2023-09-14
Supplement: s1 [file s1]

**Table S2:** Motifs and their annotation information in poplar GATA proteins.

| Annotations of GATA protein sequence motifs |                                                     |                      |                     |
|---------------------------------------------|-----------------------------------------------------|----------------------|---------------------|
| Name                                        | Sequence                                            | Description of Smart | Description of Pfam |
| Motif 1                                     | HCGTTKTPQWRRGPAGPKTLCNACGVRYK                       | NO                   | GATA                |
| Motif 2                                     | GRLVPEYRPAASPTFVSELHSNSHRKVLE                       | NO                   | NO                  |
| Motif 3                                     | RSTQPRRIASLVRFREKRKERCDFDKIRYTVRKEVALRMHRKKGQFASSK  | NO                   | CCT                 |
| Motif 4                                     | ELCVPTDDIAELEWLSNFVEDSFSDYSL                        | NO                   | NO                  |
| Motif 5                                     | EDGVVPSSRTSZLTLSFEGEVYVFPAVTPDKVQAVLLLLGGREIPTA     | TIFY                 | tify                |
| Motif 6                                     | SVSGSDYFSVDDLLDFSNDDDAEDTD                          | NO                   | NO                  |
| Motif 7                                     | TRVPGKARSKRSRAAPTWR                                 | NO                   | NO                  |
| Motif 8                                     | PELRKRKLGEEEAAILLMALSCGSVYA                         | NO                   | NO                  |
| Motif 9                                     | KKEMVRAQRQKQHRKGRDHHNRMVFIQEGGGDDYGYGFDDG           | low complexity       | NO                  |
| Motif 10                                    | NKGTLRDLSKGGRNJPFNQNEPVPDFKP                        | NO                   | NO                  |
| Motif 11                                    | MMHRCSSSQCNMVGPCSCGMYHSQNSFSMLFSPDHRKSFDETDMYP      | NO                   | NO                  |
| Motif 12                                    | MEQHYGYHQNNSWVQNQKMPCFSPANEFRIEDNDRSDTG             | NO                   | NO                  |
| Motif 13                                    | MYTPSQPMNVHNQIVSPGVDDDGAPADPIDHHHHIHYEDGTPAVV       | low complexity       | NO                  |
| Motif 14                                    | FEEFARHLTNEEQQLLKYLPLDTAKLPNSIESMFDSPQFKENINCYQQ    | NO                   | UCH-binding         |
| Motif 15                                    | VKWMPSKMRLMQEMTNSNCSETDHQPMKFMLKFHNQQCQNNEIN        | NO                   | NO                  |
| Motif 16                                    | VEKLT KDLYTILHEQQSSCFSGSSEEDLLFDNETPMVSVEIGHGSVLIRH | NO                   | NO                  |
| Motif 17                                    | PFAEEEELEWLLDDDDFPNVLDGFGDLSGEPGEIPEHHDPQVVJEDSST   | low complexity       | NO                  |
| Motif 18                                    | GTPSTRLSEDDEKMRHDQRRSGSCMSNFCWDILQTKNDSTPYPPQAHKT   | NO                   | NO                  |
| Motif 19                                    | FAESRLVIKIPHEVDPEHKKKKKIKFIVPLGPVEMNQNSQPQQA VRKCM  | low complexity       | NO                  |
| Motif 20                                    | MRRQKEMLGPEQQQ                                      | NO                   | NO                  |
