# Supplementary material for: Comprehensive Analysis and Characterization of the GATA Gene Family, with Emphasis on the GATA6 Transcription Factor in Poplar
Source: MDPI journal article supplement (doi:10.3390/ijms241814118), 2023-09-14
Supplement: s1 [file s1]

**Table S4:** Syntenic gene pairs among different species.

| Syntenic gene pairs ( <i>P. trichocarpa</i> and <i>A. thaliana</i> ) |             |             |             |             |                     |
|----------------------------------------------------------------------|-------------|-------------|-------------|-------------|---------------------|
| Gene ID                                                              | Gene ID     | Ka          | Ks          | Ka/Ks       | Selection Pressure  |
| PtrGATA2                                                             | AT5G47140.1 | 0.303278967 | 1.648740351 | 0.183945863 | Purifying selection |
| PtrGATA6                                                             | AT2G45050.1 | 0.283918241 | 3.711569918 | 0.076495458 | Purifying selection |
| PtrGATA6                                                             | AT3G60530.1 | 0.263736761 | 1.942831482 | 0.135748655 | Purifying selection |
| PtrGATA8                                                             | AT4G17570.2 | 0.292931563 | 1.375292751 | 0.212995788 | Purifying selection |
| PtrGATA16                                                            | AT2G18380.1 | 0.432558889 | 2.137317779 | 0.202383985 | Purifying selection |
| PtrGATA15                                                            | AT3G51080.1 | 0.395179718 | NaN         | NaN         | No                  |
| PtrGATA15                                                            | AT4G36240.1 | 0.426044017 | 2.72818962  | 0.156163638 | Purifying selection |
| PtrGATA16                                                            | AT4G36620.1 | 0.361456378 | 3.171843881 | 0.113957809 | Purifying selection |
| PtrGATA15                                                            | AT5G66320.1 | 0.365724168 | NaN         | NaN         | No                  |
| PtrGATA22                                                            | AT2G18380.1 | 0.444545711 | 4.348344832 | 0.102233316 | Purifying selection |
| PtrGATA21                                                            | AT4G36240.1 | 0.423636434 | 3.550211351 | 0.119327103 | Purifying selection |
| PtrGATA22                                                            | AT4G36620.1 | 0.32400422  | 2.08953503  | 0.155060439 | Purifying selection |

  

| Syntenic gene pairs ( <i>P. trichocarpa</i> and <i>G. max</i> ) |                   |             |             |             |                     |
|-----------------------------------------------------------------|-------------------|-------------|-------------|-------------|---------------------|
| Gene ID                                                         | Gene ID           | Ka          | Ks          | Ka/Ks       | Selection Pressure  |
| PtrGATA2                                                        | Glyma.01G205100.1 | 0.200346494 | 0.996536227 | 0.20104286  | Purifying selection |
| PtrGATA2                                                        | Glyma.05G064800.1 | 0.195631192 | 1.171416534 | 0.167003953 | Purifying selection |
| PtrGATA3                                                        | Glyma.07G016800.1 | 0.295779126 | NaN         | NaN         | No                  |
| PtrGATA3                                                        | Glyma.08G202100.1 | 0.326257225 | NaN         | NaN         | No                  |
| PtrGATA2                                                        | Glyma.11G037900.1 | 0.190874083 | 0.965761179 | 0.197641081 | Purifying selection |
| PtrGATA2                                                        | Glyma.17G146600.1 | 0.20063993  | 1.118888077 | 0.179320823 | Purifying selection |
| PtrGATA8                                                        | Glyma.01G205100.1 | 0.20237644  | 1.125558189 | 0.179800957 | Purifying selection |
| PtrGATA8                                                        | Glyma.05G064800.1 | 0.197330672 | 1.261515864 | 0.156423456 | Purifying selection |
| PtrGATA8                                                        | Glyma.11G037900.1 | 0.201536009 | 1.029605176 | 0.195741061 | Purifying selection |
| PtrGATA8                                                        | Glyma.17G146600.1 | 0.199067701 | 1.245768961 | 0.15979504  | Purifying selection |
| PtrGATA15                                                       | Glyma.01G169400.1 | 0.260271777 | 4.235714281 | 0.061446963 | Purifying selection |

|           |                   |             |             |             |                     |
|-----------|-------------------|-------------|-------------|-------------|---------------------|
| PtrGATA15 | Glyma.02G051100.1 | 0.284523184 | NaN         | NaN         | No                  |
| PtrGATA16 | Glyma.02G056600.1 | 0.263452843 | NaN         | NaN         | No                  |
| PtrGATA18 | Glyma.02G215600.1 | 0.231009125 | 0.850379474 | 0.271654163 | Purifying selection |
| PtrGATA13 | Glyma.03G232900.1 | 0.181251969 | NaN         | NaN         | No                  |
| PtrGATA16 | Glyma.11G068700.1 | 0.201497968 | NaN         | NaN         | No                  |
| PtrGATA18 | Glyma.14G182800.1 | 0.215705964 | 0.935351378 | 0.230614899 | Purifying selection |
| PtrGATA16 | Glyma.16G139400.1 | 0.259701979 | NaN         | NaN         | No                  |
| PtrGATA13 | Glyma.19G229900.1 | 0.275841253 | NaN         | NaN         | No                  |
| PtrGATA19 | Glyma.04G051300.1 | 0.434389023 | 1.51657945  | 0.286426816 | Purifying selection |
| PtrGATA20 | Glyma.04G084900.1 | 0.230465301 | 4.964454665 | 0.046423085 | Purifying selection |
| PtrGATA20 | Glyma.06G086400.1 | 0.253430218 | 4.547196036 | 0.055733295 | Purifying selection |
| PtrGATA19 | Glyma.14G094800.1 | 0.431548358 | 1.716668824 | 0.251387077 | Purifying selection |
| PtrGATA19 | Glyma.17G228700.1 | 0.475806273 | 1.880534629 | 0.253016491 | Purifying selection |
| PtrGATA21 | Glyma.01G169400.1 | 0.286719009 | 1.934885409 | 0.148183974 | Purifying selection |
| PtrGATA21 | Glyma.02G051100.1 | 0.305336913 | NaN         | NaN         | No                  |
| PtrGATA22 | Glyma.02G056600.1 | 0.255027024 | NaN         | NaN         | No                  |
| PtrGATA22 | Glyma.11G068700.1 | 0.213393233 | NaN         | NaN         | No                  |
| PtrGATA22 | Glyma.16G139400.1 | 0.258204228 | NaN         | NaN         | No                  |
| PtrGATA25 | Glyma.10G210500.1 | 0.216925925 | 1.704992941 | 0.127229808 | Purifying selection |
| PtrGATA25 | Glyma.20G180100.1 | 0.218028979 | 1.934194116 | 0.112723422 | Purifying selection |
| PtrGATA31 | Glyma.16G042300.1 | 0.291864937 | 1.597028156 | 0.182755035 | Purifying selection |
| PtrGATA31 | Glyma.19G110200.1 | 0.25354121  | 1.824337162 | 0.138977167 | Purifying selection |
| PtrGATA34 | Glyma.08G067200.1 | 0.341750994 | 1.391529122 | 0.24559385  | Purifying selection |
| PtrGATA36 | Glyma.04G084900.1 | 0.262522715 | 2.126516219 | 0.123452017 | Purifying selection |
| PtrGATA36 | Glyma.06G086400.1 | 0.282367964 | 1.726659958 | 0.163534206 | Purifying selection |
| PtrGATA38 | Glyma.16G042300.1 | 0.29710064  | 1.381667455 | 0.215030497 | Purifying selection |
| PtrGATA38 | Glyma.19G110200.1 | 0.262299742 | 1.545926683 | 0.169671528 | Purifying selection |

Syntenic gene pairs (*P. trichocarpa* and *S. lycopersicum*)

| Gene ID   | Gene ID            | Ka          | Ks          | Ka/Ks       | Selection Pressure  |
|-----------|--------------------|-------------|-------------|-------------|---------------------|
| PtrGATA3  | Solyc03g120890.2.1 | 0.382505219 | 2.6973796   | 0.141806225 | Purifying selection |
| PtrGATA2  | Solyc08g077960.2.1 | 0.221705389 | 1.431282855 | 0.154899773 | Purifying selection |
| PtrGATA2  | Solyc08g007190.2.1 | 0.216415281 | 1.401711831 | 0.154393561 | Purifying selection |
| PtrGATA6  | Solyc01g090760.2.1 | 0.267127866 | 2.17509595  | 0.122811992 | Purifying selection |
| PtrGATA7  | Solyc01g100220.2.1 | 0.461838444 | 1.740293784 | 0.265379586 | Purifying selection |
| PtrGATA4  | Solyc04g076530.2.1 | 0.268489503 | 1.456690378 | 0.184314737 | Purifying selection |
| PtrGATA7  | Solyc09g075610.2.1 | 0.267686909 | 1.417048454 | 0.188904556 | Purifying selection |
| PtrGATA8  | Solyc08g077960.2.1 | 0.206010393 | 1.312857059 | 0.156917611 | Purifying selection |
| PtrGATA13 | Solyc01g100220.2.1 | 0.388522876 | 3.954749669 | 0.098242091 | Purifying selection |
| PtrGATA15 | Solyc02g084590.2.1 | 0.299467471 | 2.572708943 | 0.116401613 | Purifying selection |
| PtrGATA16 | Solyc02g085190.1.1 | 0.21980105  | 1.158854163 | 0.189671019 | Purifying selection |
| PtrGATA15 | Solyc02g062380.1.1 | 0.400207395 | 3.56611572  | 0.112225016 | Purifying selection |
| PtrGATA16 | Solyc02g062760.2.1 | 0.309459826 | NaN         | NaN         | No                  |
| PtrGATA15 | Solyc03g033660.2.1 | 0.389136207 | NaN         | NaN         | No                  |
| PtrGATA17 | Solyc04g076530.2.1 | 0.296003079 | 1.38773021  | 0.213300162 | Purifying selection |
| PtrGATA20 | Solyc08g066510.2.1 | 0.293869138 | 2.542457214 | 0.115584694 | Purifying selection |
| PtrGATA21 | Solyc02g084590.2.1 | 0.308119562 | 2.285749394 | 0.134800238 | Purifying selection |
| PtrGATA22 | Solyc02g085190.1.1 | 0.21475443  | 1.47286008  | 0.145807761 | Purifying selection |
| PtrGATA33 | Solyc09g075610.2.1 | 0.310045034 | 1.988772948 | 0.155897652 | Purifying selection |
| PtrGATA34 | Solyc01g106030.2.1 | 0.553949968 | 2.797981637 | 0.197981988 | Purifying selection |

Syntenic gene pairs (*P. trichocarpa* and *A. comosus*)

| Gene ID  | Gene ID     | Ka          | Ks          | Ka/Ks       | Selection Pressure  |
|----------|-------------|-------------|-------------|-------------|---------------------|
| PtrGATA2 | Aco012875.1 | 0.394040903 | 2.385477524 | 0.165183238 | Purifying selection |
| PtrGATA2 | Aco011659.1 | 0.329956271 | 1.973963143 | 0.167154221 | Purifying selection |
| PtrGATA8 | Aco012875.1 | 0.404094343 | 2.480913903 | 0.162881244 | Purifying selection |
| PtrGATA8 | Aco011659.1 | 0.326611184 | 1.678335346 | 0.194604246 | Purifying selection |

Syntenic gene pairs (*P. trichocarpa* and *O. sativa*)

| Gene ID | Gene ID | Ka | Ks | Ka/Ks | Selection Pressure |
|---------|---------|----|----|-------|--------------------|
| NO      |         |    |    |       |                    |

Syntenic gene pairs (*P. trichocarpa* and *S. bicolor*)

| Gene ID | Gene ID | Ka | Ks | Ka/Ks | Selection Pressure |
|---------|---------|----|----|-------|--------------------|
| NO      |         |    |    |       |                    |
