# Supplementary material for: Comprehensive Analysis and Characterization of the GATA Gene Family, with Emphasis on the GATA6 Transcription Factor in Poplar
Source: MDPI journal article supplement (doi:10.3390/ijms241814118), 2023-09-14
Supplement: s1 [file s1]

**Table S1:** Accession numbers, physicochemical properties, and subcellular localization predictions of poplar GATA family members.

| Gene Name        | Accession number   | AA <sup>a</sup> | MW <sup>b</sup> (Da) | pI <sup>c</sup> | II <sup>d</sup> | AI <sup>e</sup> | GRAVY <sup>f</sup> | Subcellular Localization |
|------------------|--------------------|-----------------|----------------------|-----------------|-----------------|-----------------|--------------------|--------------------------|
| <i>PtrGATA1</i>  | Potri.001G053500.2 | 258             | 28925.58             | 8.55            | 53.49           | 61.59           | -0.755             | Nucleus                  |
| <i>PtrGATA2</i>  | Potri.001G151700.2 | 544             | 60287.6              | 6.77            | 50.78           | 72.74           | -0.644             | Chloroplast              |
| <i>PtrGATA3</i>  | Potri.001G188500.3 | 303             | 33611.21             | 5.81            | 58.46           | 49.93           | -0.706             | Nucleus                  |
| <i>PtrGATA4</i>  | Potri.002G110800.1 | 360             | 39264.4              | 4.86            | 47.96           | 69.33           | -0.702             | Nucleus                  |
| <i>PtrGATA5</i>  | Potri.002G110900.1 | 290             | 31499.81             | 5.93            | 45.45           | 60.83           | -0.698             | Nucleus                  |
| <i>PtrGATA6</i>  | Potri.002G142800.1 | 246             | 27390.13             | 6.03            | 52.06           | 55.89           | -0.738             | Nucleus                  |
| <i>PtrGATA7</i>  | Potri.002G199800.1 | 147             | 16627.16             | 9.4             | 65.96           | 54.49           | -0.879             | Nucleus                  |
| <i>PtrGATA8</i>  | Potri.003G082800.1 | 540             | 60284.54             | 6.58            | 54.94           | 70.57           | -0.672             | Chloroplast              |
| <i>PtrGATA9</i>  | Potri.003G174800.2 | 258             | 28865.61             | 9.06            | 52.17           | 61.2            | -0.783             | Nucleus                  |
| <i>PtrGATA10</i> | Potri.003G213300.1 | 226             | 25422.98             | 8.74            | 38.45           | 45              | -1.071             | Nucleus                  |
| <i>PtrGATA11</i> | Potri.004G161500.1 | 327             | 36312.44             | 8.53            | 56.91           | 50.4            | -0.73              | Nucleus                  |
| <i>PtrGATA12</i> | Potri.004G211800.1 | 301             | 33982.35             | 8.57            | 68.69           | 56.38           | -0.674             | Nucleus                  |
| <i>PtrGATA13</i> | Potri.005G020500.1 | 161             | 17587.24             | 9.78            | 51.5            | 60              | -0.675             | Nucleus                  |
| <i>PtrGATA14</i> | Potri.005G066100.2 | 240             | 27608.63             | 8.71            | 59.12           | 68.75           | -0.58              | Nucleus                  |
| <i>PtrGATA15</i> | Potri.005G117600.1 | 333             | 36840.45             | 7.1             | 62.45           | 60.54           | -0.63              | Nucleus                  |
| <i>PtrGATA16</i> | Potri.005G122700.1 | 259             | 29015.8              | 7.95            | 64.92           | 35.48           | -0.973             | Nucleus                  |
| <i>PtrGATA17</i> | Potri.005G152500.1 | 365             | 39708.23             | 5.13            | 43.65           | 67.84           | -0.626             | Nucleus                  |
| <i>PtrGATA18</i> | Potri.005G152800.1 | 288             | 31463.7              | 5.67            | 44.14           | 61.94           | -0.698             | Nucleus                  |
| <i>PtrGATA19</i> | Potri.006G229200.3 | 303             | 33567.46             | 9.04            | 59.98           | 56.4            | -0.772             | Nucleus                  |
| <i>PtrGATA20</i> | Potri.006G237700.1 | 373             | 41397.57             | 6.04            | 45.33           | 56.43           | -0.791             | Nucleus                  |
| <i>PtrGATA21</i> | Potri.007G016600.1 | 376             | 41808.29             | 6.95            | 64.79           | 57.5            | -0.589             | Chloroplast              |
| <i>PtrGATA22</i> | Potri.007G024500.1 | 254             | 28668.6              | 8.46            | 64.84           | 38.07           | -0.941             | Nucleus                  |
| <i>PtrGATA23</i> | Potri.007G116550.1 | 318             | 33403.12             | 5.49            | 34.43           | 66.92           | -0.462             | Extracellular            |
| <i>PtrGATA24</i> | Potri.007G116700.1 | 384             | 43220.87             | 4.9             | 43.09           | 58.1            | -0.852             | Nucleus                  |
| <i>PtrGATA25</i> | Potri.008G038900.2 | 354             | 38941.87             | 6.52            | 56.02           | 60.31           | -0.597             | Nucleus                  |
| <i>PtrGATA26</i> | Potri.008G213900.1 | 138             | 14783.7              | 9.69            | 61.85           | 63.04           | -0.909             | Nucleus                  |
| <i>PtrGATA27</i> | Potri.009G123400.1 | 329             | 36593.74             | 6.61            | 52.09           | 55.99           | -0.629             | Nucleus                  |
| <i>PtrGATA28</i> | Potri.010G001300.2 | 149             | 16059.17             | 9.68            | 63.22           | 64.9            | -0.87              | Nucleus                  |
| <i>PtrGATA29</i> | Potri.010G223300.2 | 352             | 38612.24             | 5.65            | 55.82           | 57.33           | -0.591             | Nucleus                  |
| <i>PtrGATA30</i> | Potri.010G251600.1 | 307             | 33369.72             | 7.8             | 29.88           | 48.96           | -0.893             | Nucleus                  |
| <i>PtrGATA31</i> | Potri.013G059600.1 | 295             | 32644.49             | 6.53            | 51.49           | 61.15           | -0.754             | Nucleus                  |
| <i>PtrGATA32</i> | Potri.014G058600.1 | 251             | 27963.8              | 6.42            | 60.52           | 57.49           | -0.78              | Nucleus                  |
| <i>PtrGATA33</i> | Potri.014G124400.1 | 133             | 14704.83             | 9.77            | 67.48           | 60.98           | -0.841             | Nucleus                  |
| <i>PtrGATA34</i> | Potri.017G042200.2 | 383             | 43298.04             | 5.11            | 44.15           | 59.01           | -0.864             | Nucleus                  |
| <i>PtrGATA35</i> | Potri.017G042300.3 | 109             | 12596.12             | 10.69           | 40.81           | 84.95           | -0.134             | Cytoplasmic              |
| <i>PtrGATA36</i> | Potri.018G044900.1 | 380             | 42096.26             | 6.22            | 41.9            | 56.18           | -0.802             | Nucleus                  |
| <i>PtrGATA37</i> | Potri.018G053600.1 | 303             | 33666.66             | 8.78            | 50.69           | 60.83           | -0.74              | Nucleus                  |
| <i>PtrGATA38</i> | Potri.019G033000.1 | 294             | 32231.74             | 6               | 51.37           | 56.43           | -0.792             | Nucleus                  |

<sup>a</sup> Length of the amino acid sequence; <sup>b</sup> Molecular weight of the protein; <sup>c</sup> Theoretical pI of the protein; <sup>d</sup> Instability index (II) of the protein; <sup>e</sup> Aliphatic index of the protein; <sup>f</sup> Grand average of hydropathicity of the protein.
