# Supplementary material for: Comprehensive Analysis and Characterization of the GATA Gene Family, with Emphasis on the GATA6 Transcription Factor in Poplar
Source: MDPI journal article supplement (doi:10.3390/ijms241814118), 2023-09-14
Supplement: s1 [file s1]

**Table S3:** Tandemly or segmentally duplicated poplar *GATA* gene pairs.

| <b>Name1</b> | <b>Name2</b> | <b>Duplication Type</b> | <b>Ka</b>   | <b>Ks</b>   | <b>Ka/Ks</b> | <b>Selection Pressure</b> |
|--------------|--------------|-------------------------|-------------|-------------|--------------|---------------------------|
| PtrGATA4     | PtrGATA5     | tandem duplication      | 0.429698813 | 1.855869185 | 0.231535076  | Purifying selection       |
| PtrGATA34    | PtrGATA35    | tandem duplication      | 0.426080913 | NaN         | NaN          | No                        |
| PtrGATA1     | PtrGATA9     | Segmental duplication   | 0.057473093 | 0.316440172 | 0.181623883  | Purifying selection       |
| PtrGATA15    | PtrGATA21    | Segmental duplication   | 0.087057492 | 0.353709629 | 0.246127005  | Purifying selection       |
| PtrGATA16    | PtrGATA22    | Segmental duplication   | 0.044386501 | 0.213230334 | 0.208162225  | Purifying selection       |
| PtrGATA2     | PtrGATA8     | Segmental duplication   | 0.037638274 | 0.165342398 | 0.227638372  | Purifying selection       |
| PtrGATA20    | PtrGATA36    | Segmental duplication   | 0.044042799 | 0.255510416 | 0.172371835  | Purifying selection       |
| PtrGATA23    | PtrGATA35    | Segmental duplication   | 0.278797311 | 0.718673014 | 0.387933463  | Purifying selection       |
| PtrGATA24    | PtrGATA34    | Segmental duplication   | 0.0716354   | 0.287947801 | 0.248779118  | Purifying selection       |
| PtrGATA31    | PtrGATA38    | Segmental duplication   | 0.106485544 | 0.251183725 | 0.423934886  | Purifying selection       |
| PtrGATA6     | PtrGATA32    | Segmental duplication   | 0.062784223 | 0.299724621 | 0.209473024  | Purifying selection       |
| PtrGATA7     | PtrGATA33    | Segmental duplication   | 0.088162344 | 0.228158531 | 0.386408273  | Purifying selection       |
