# Supplementary material for: Comprehensive Analysis and Characterization of the GATA Gene Family, with Emphasis on the GATA6 Transcription Factor in Poplar
Source: MDPI journal article supplement (doi:10.3390/ijms241814118), 2023-09-14
Supplement: s1 [file s1]

**Table S5:** Primers used in this study.

Primer sequences

| Name                     | 5' Primers                            | 3' Primers                            |
|--------------------------|---------------------------------------|---------------------------------------|
| <i>GATA6_ gene clone</i> | CTATGCATCCTTCATCTCCAAG                | CTGCACCGCTGCACTACTAATC                |
| <i>GATA6_pBII21-GFP</i>  | GGAGAGAACACGGGGGACATGAATGTCTATGGAGGAG | CCTCGCCCTTGCTCACCATGCAAAC TTCATAACC   |
| <i>GATA6_pGBKT7</i>      | GCCATGGAGGCCGAATTCATGAATGTCTATGGAGGAG | TGCGGCCGCTGCAGGTCGTTAGCAAAC TTCATAACC |
| <i>GATA6_RT-qPCR</i>     | GACTTCTCTAATGATGACCTTC                | CGATAGCCACTCTAGCTCTGCC                |
| <i>ACT</i>               | ACCCTCCAATCCAGACACTG                  | TTGCTGACCGTATGAGCAAG                  |
